# Supplementary material for: Simultaneous multimodal fNIRS-EEG recordings reveal new insights in neural activity during motor execution, observation, and imagery
Source: PubMed Central journal article supplement (PMC10060581; doi:10.1038/s41598-023-31609-5), 2023-03-29

**Simultaneous Multimodal fNIRS-EEG Recordings Reveal New Insights in Neural Activity  
During Motor Execution, Observation, and Imagery**

**Supplementary Information**

**Supplementary Table S1.** EEG Channel Assignments

| <b>ROI</b> | <b>Channels in Left Hemisphere</b>   | <b>Channels in Right Hemisphere</b>       |
|------------|--------------------------------------|-------------------------------------------|
| Frontal    | E19, E20, E23, E24, E27, E28         | E3, E4, E117, E118, E123, E124            |
| Central    | E29, E30, E35, E36, E37, E41,<br>E42 | E87, E93, E103, E104, E105,<br>E110, E111 |
| Parietal   | E47, E51, E52, E53, E59, E60         | E85, E86, E91, E92, E97, E98              |
| Occipital  | E66, E69, E70, E71, E74              | E76, E82, E83, E84, E89                   |

**Supplementary Table S2.** Mean and SE for HbO and HbR Z scores

|                         | <b>HbO Z score</b> |              |              | <b>HbR Z score</b> |              |              |
|-------------------------|--------------------|--------------|--------------|--------------------|--------------|--------------|
|                         | <b>ME</b>          | <b>MO</b>    | <b>MI</b>    | <b>ME</b>          | <b>MO</b>    | <b>MI</b>    |
| <b>Left Hemisphere</b>  |                    |              |              |                    |              |              |
| PRCG                    | 0.28 ± 0.02        | 0.07 ± 0.00  | -0.19 ± 0.01 | -0.44 ± 0.03       | -0.47 ± 0.03 | -0.44 ± 0.03 |
| POCG                    | -0.28 ± 0.02       | 0.11 ± 0.01  | 0.09 ± 0.01  | -1.01 ± 0.06       | -0.06 ± 0.00 | -0.24 ± 0.01 |
| SPL                     | 0.23 ± 0.02        | 0.22 ± 0.02  | -0.02 ± 0.00 | -0.10 ± 0.01       | 0.32 ± 0.02  | 0.31 ± 0.02  |
| IPL                     | -0.42 ± 0.03       | -0.38 ± 0.02 | -0.41 ± 0.02 | 0.30 ± 0.02        | -0.13 ± 0.01 | -0.28 ± 0.02 |
| SMG                     | 0.44 ± 0.03        | 0.18 ± 0.01  | 0.35 ± 0.02  | 0.65 ± 0.04        | 0.51 ± 0.03  | 0.16 ± 0.01  |
| AG                      | 0.23 ± 0.01        | -0.40 ± 0.03 | -0.41 ± 0.03 | -0.60 ± 0.04       | -0.36 ± 0.02 | -0.13 ± 0.01 |
| <b>Right Hemisphere</b> |                    |              |              |                    |              |              |
| PRCG                    | -1.43 ± 0.09       | -0.99 ± 0.06 | -1.23 ± 0.08 | -0.27 ± 0.02       | -0.07 ± 0.00 | -0.14 ± 0.01 |
| POCG                    | 0.46 ± 0.03        | 0.32 ± 0.02  | 0.27 ± 0.02  | -0.19 ± 0.01       | -0.23 ± 0.01 | -0.15 ± 0.01 |
| SPL                     | 0.50 ± 0.03        | 0.24 ± 0.02  | -0.04 ± 0.00 | -0.76 ± 0.05       | -0.25 ± 0.02 | -0.19 ± 0.01 |
| IPL                     | -0.30 ± 0.02       | -0.56 ± 0.03 | -0.99 ± 0.06 | 0.46 ± 0.03        | 0.18 ± 0.01  | -0.10 ± 0.01 |
| SMG                     | 0.14 ± 0.01        | 0.66 ± 0.04  | -0.08 ± 0.01 | -0.35 ± 0.02       | 0.46 ± 0.03  | 0.61 ± 0.04  |
| AG                      | -0.19 ± 0.01       | -0.47 ± 0.03 | -0.42 ± 0.03 | -0.11 ± 0.01       | -0.38 ± 0.02 | -0.13 ± 0.01 |

Orange shade indicates positive value, while blue shade indicates negative value.

**Supplementary Table S3.** T-Statistics and Effect Sizes for fNIRS Unimodal Post hoc Analyses

| <b>Comparisons</b>  | <b>t</b> | <b>df</b> | <b>p-value</b> | <b>Cohen's d (95 % CI)</b> |
|---------------------|----------|-----------|----------------|----------------------------|
| Left POCG, MO vs ME | 2.04     | 247       | 0.04           | 0.13 (0.01 to 0.26)        |
| Left AG, MO vs ME   | -2.14    | 237       | 0.03           | -0.14 (-0.27 to -0.11)     |
| Right SMG, MO vs ME | 1.75     | 221       | 0.08           | 0.12 (-0.02 to 0.25)       |
| Right SMG, MO vs MI | 2.42     | 221       | 0.02           | -0.16 (-0.03 to 0.29)      |
| Left AG, ME vs MI   | 2.24     | 243       | 0.03           | 0.14 (0.17 to 0.27)        |
| Right SPL, ME vs MI | 1.92     | 218       | 0.06           | 0.13 (-0.00 to 0.26)       |
| Right IPL, ME vs MI | 2.13     | 263       | 0.04           | 0.13 (0.10 to 0.25)        |

**Supplementary Table S4.** T-Statistics and Effect Sizes for EEG Unimodal Post hoc Analyses

| <b>Comparisons</b>       | <b>t</b> | <b>df</b> | <b>p-value</b> | <b>Cohen's d (95 % CI)</b> |
|--------------------------|----------|-----------|----------------|----------------------------|
| Left central, ME vs MO   | -2.50    | 17        | 0.02           | -0.59 (-1.08 to -0.79)     |
| Left central, ME vs MI   | -2.66    | 17        | 0.02           | -0.63 (-1.13 to -0.11)     |
| Right central, MI vs ME  | 2.40     | 18        | 0.03           | 0.55 (0.06 to 1.03)        |
| Right central, MI vs MO  | 2.14     | 19        | 0.05           | 0.48 (0.01 to 0.94)        |
| Right parietal, MI vs ME | 2.14     | 18        | 0.05           | 0.49 (0.01 to 0.96)        |
| Right parietal, MI vs MO | 3.34     | 19        | <0.01          | 0.75 (0.24 to 1.24)        |
| Right frontal, MI vs MO  | 2.68     | 19        | 0.02           | 0.60 (0.12 to 1.07)        |

### Supplementary Figure S1. EEG-fNIRS data fusion pipeline

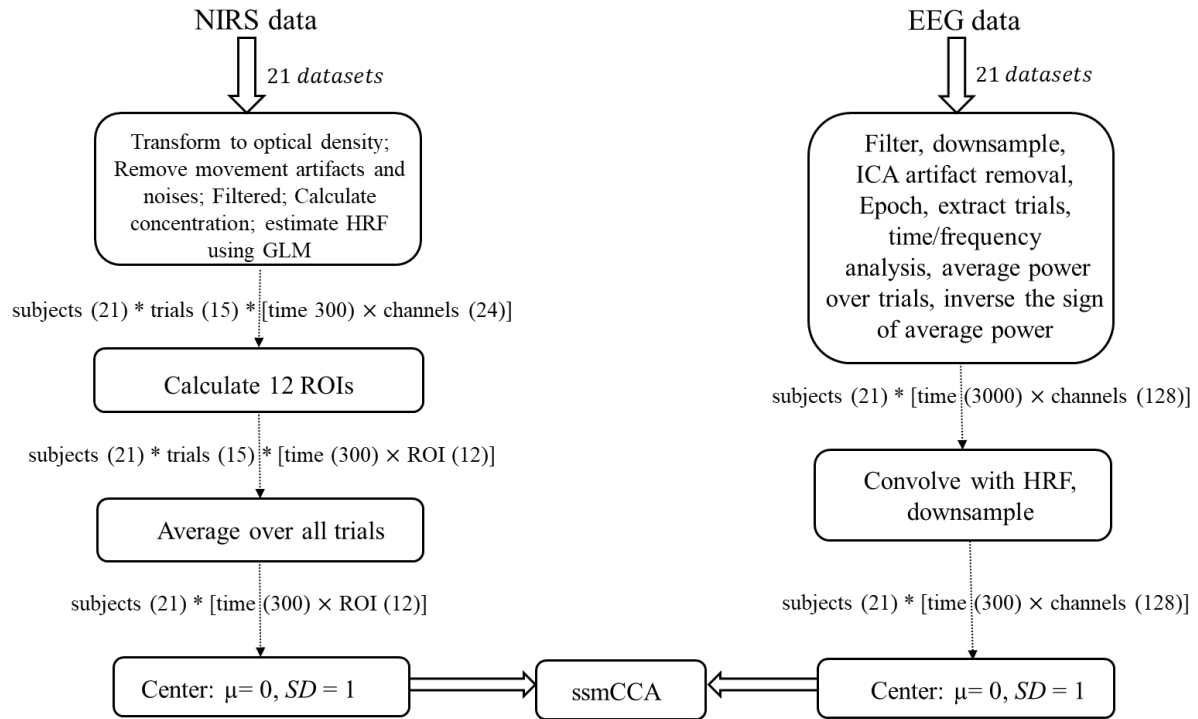

Supplement: 41598_2023_31609_MOESM1_ESM.pdf [file 41598_2023_31609_MOESM1_ESM.pdf]
